# Supplementary material
Source: publisher figshare collection journal article supplement (https://acs.figshare.com/ndownloader/files/24685272)
Supplement: Supplementary file 1 [file 24685272]

# Supporting Information

## Network Structure and Dissolution Properties of Phosphate-Doped Borosilicate Glasses

*Arun Krishnamurthy,<sup>†</sup> Tony Nguyen,<sup>†</sup> Mostafa Fayek,<sup>§,‡</sup> Brandi Shabaga<sup>‡</sup> and Scott Kroeker<sup>\*,†,§</sup>*

<sup>†</sup>Department of Chemistry, University of Manitoba, Winnipeg, Manitoba R3T 2N2, Canada

<sup>§</sup>Manitoba Institute for Materials, University of Manitoba, Winnipeg, Manitoba R3T 2N2,  
Canada

<sup>‡</sup>Department of Geological Sciences, University of Manitoba, Winnipeg, Manitoba R3T 2N2,  
Canada

**Table S1.**  $^{23}\text{Na}$  MAS NMR fitting parameters for sample P4

| $\delta_{\text{iso}}$ (ppm) | $C_Q$ (MHz)          | $\eta_Q$ | Int. (%) <sup>c</sup> |
|-----------------------------|----------------------|----------|-----------------------|
| 2.46(0.3)                   | 2.54(0.05)           | 0.6(0.2) | 13(5)                 |
| -11.3(0.2) <sup>a</sup>     | 28.3(1) <sup>b</sup> |          | 87(5)                 |

<sup>a</sup>Peak position (ppm)<sup>b</sup>Peak width (ppm)<sup>c</sup> Int. (%) = Integrated intensity**Table S2.** Fitting parameters used in the deconvolution of  $^{31}\text{P}$  MAS NMR spectra

|        | $P^0$                          |                   |                  | $P^1$                          |                   |                  | $P^2_{\text{nB(Al)}}$       |                   |                  | $\text{Na}_4\text{P}_2\text{O}_7$ |                   |                  |
|--------|--------------------------------|-------------------|------------------|--------------------------------|-------------------|------------------|-----------------------------|-------------------|------------------|-----------------------------------|-------------------|------------------|
|        | $\delta_{\text{iso}}$<br>(ppm) | FWHM <sup>a</sup> | (%) <sup>b</sup> | $\delta_{\text{iso}}$<br>(ppm) | FWHM <sup>a</sup> | (%) <sup>b</sup> | $\delta_{\text{iso}}$ (ppm) | FWHM <sup>a</sup> | (%) <sup>b</sup> | $\delta_{\text{iso}}$<br>(ppm)    | FWHM <sup>a</sup> | (%) <sup>b</sup> |
| P1     | 15.7(0.5)                      | 3.6(1)            | 2(1)             | 3.4(0.3)                       | 7.4(0.5)          | 69(5)            | -6.5(0.5)                   | 10.3(1)           | 29(5)            | **                                | **                | **               |
| P2     | 14.5(0.2)                      | 3.6(0.5)          | 11(2)            | 3.3(0.3)                       | 7.2(0.3)          | 68(3)            | -6.7(0.5)                   | 10.4(1)           | 21(3)            | **                                | **                | **               |
| P3     | 14.5(0.2)                      | 3.1(0.2)          | 24(2)            | 2.6(0.3)                       | 3.1(0.3)          | 51(8)            | -6.5(1)                     | 10.4(2)           | 9(4)             | 5.6(0.6)                          | 3.1(0.5)          | 16(6)            |
| P4     | 15.3(0.2)                      | 3.5(0.3)          | 6(2)             | 2.4(0.5)                       | 4.9(1.5)          | 65(15)           | -6.3(1.5)                   | 10.4(2)           | 8(4)             | 5.6(1)                            | 4.2(1.5)          | 21(10)           |
| P4-Mo3 | 12.3(0.5)                      | 4.4(1)            | 3(2)             | -0.1(0.5)                      | 8.1(2)            | 64(20)           | -6.2(3)                     | 11.3(3)           | 19(15)           | 5.8(1)                            | 4.9(2)            | 13(8)            |

<sup>a</sup>FWHM = Peak width (ppm)<sup>b</sup>(%) = Integrated intensity (%)

**Table S3.**  $^{27}\text{Al}$  MAS NMR fit parameters

|        | $^{[4]}\text{Al}$                               |                                  |                          | $^{[5]}\text{Al}$                               |                                    |                          | $^{[6]}\text{Al}$                               |                                  |                          |
|--------|-------------------------------------------------|----------------------------------|--------------------------|-------------------------------------------------|------------------------------------|--------------------------|-------------------------------------------------|----------------------------------|--------------------------|
|        | $\delta_{\text{iso}}$<br>(ppm)<br>( $\pm 0.2$ ) | FWHM <sup>a</sup><br>( $\pm 1$ ) | Int.<br>(%) <sup>b</sup> | $\delta_{\text{iso}}$<br>(ppm)<br>( $\pm 0.2$ ) | FWHM <sup>a</sup><br>( $\pm 0.5$ ) | Int.<br>(%) <sup>b</sup> | $\delta_{\text{iso}}$<br>(ppm)<br>( $\pm 0.2$ ) | FWHM <sup>a</sup><br>( $\pm 2$ ) | Int.<br>(%) <sup>b</sup> |
| P0     | 56.9                                            | 13.7                             | 81(3)                    | 14.3                                            | 5.8                                | 19(3)                    | **                                              | **                               | **                       |
| P1     | 56.3                                            | 13.9                             | 84(2)                    | 14.4                                            | 5.3                                | 16(2)                    | **                                              | **                               | **                       |
| P2     | 56.2                                            | 14.0                             | 84(2)                    | 14.4                                            | 5.3                                | 16(2)                    | **                                              | **                               | **                       |
| P3     | 56.4                                            | 14.1                             | 90(1)                    | 14.6                                            | 5.6                                | 10(1)                    | **                                              | **                               | **                       |
| P4     | 54.9                                            | 14.1                             | 84(2)                    | 14.1                                            | 5.4                                | 16(2)                    | **                                              | **                               | **                       |
| P4-Mo3 | 54.2                                            | 14.7                             | 79(2)                    | 14.4                                            | 5.9                                | 15(1)                    | -6.1                                            | 14.9                             | 6(2)                     |

<sup>a</sup>FWHM = Peak width (ppm)<sup>b</sup>Int. (%) = Integrated intensity**Table S4.**  $^{29}\text{Si}$  MAS NMR fit parameters

|        | $\text{Q}^3$   |                       | $\text{Q}^4$   |                       |
|--------|----------------|-----------------------|----------------|-----------------------|
|        | Peak max (ppm) | Int. (%) <sup>a</sup> | Peak max (ppm) | Int. (%) <sup>a</sup> |
| P0     | -89(2)         | 63(17)                | -101(3)        | 37(17)                |
| P2     | -92(5)         | 41(14)                | -102(3)        | 59(14)                |
| P4     | -93(2)         | 10(10)                | -102(1)        | 90(10)                |
| P4-Mo3 | **             | **                    | -105           | 100                   |

<sup>a</sup>Int. (%) = Integrated Intensity

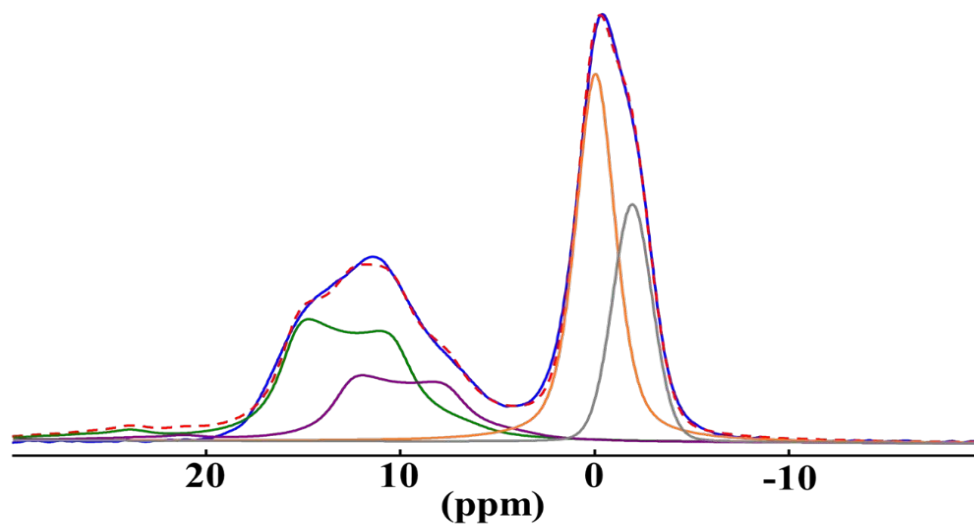

**Figure S1.** Deconvolution of  $^{11}\text{B}$  MAS NMR spectrum of sample P0. Green, magenta, orange, and grey components represent  $^{[3]}\text{B}_{\text{non-ring}}$ ,  $^{[3]}\text{B}_{\text{ring}}$ ,  $^{[4]}\text{B}_{3\text{Si}}$  and  $^{[4]}\text{B}_{4\text{Si}}$  units, respectively.

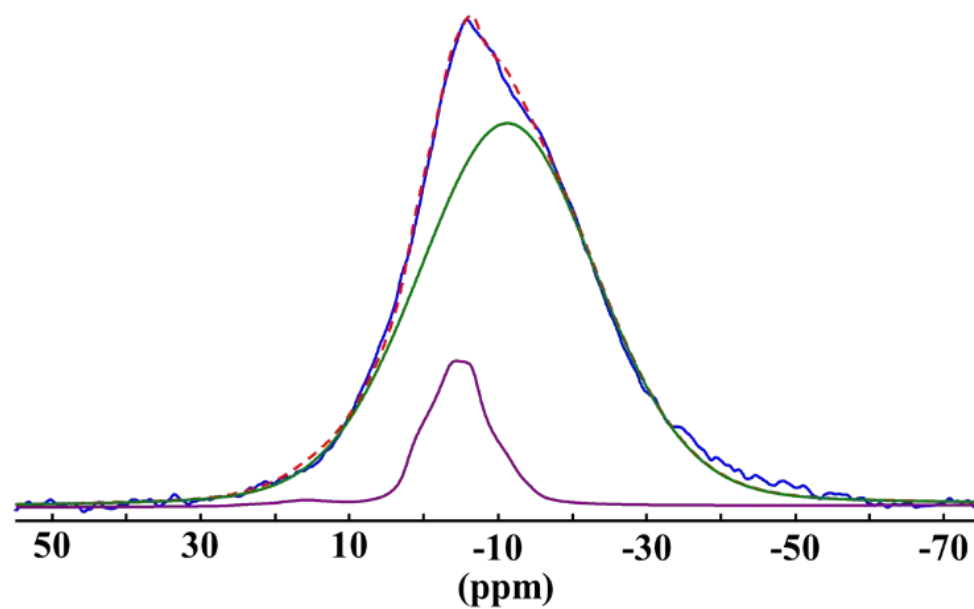

**Figure S2.** Deconvolution of the  $^{23}\text{Na}$  MAS NMR spectrum of P4 representing glassy (green) and poorly-crystalline  $\text{Na}_4\text{P}_2\text{O}_7$  (magenta) phases.

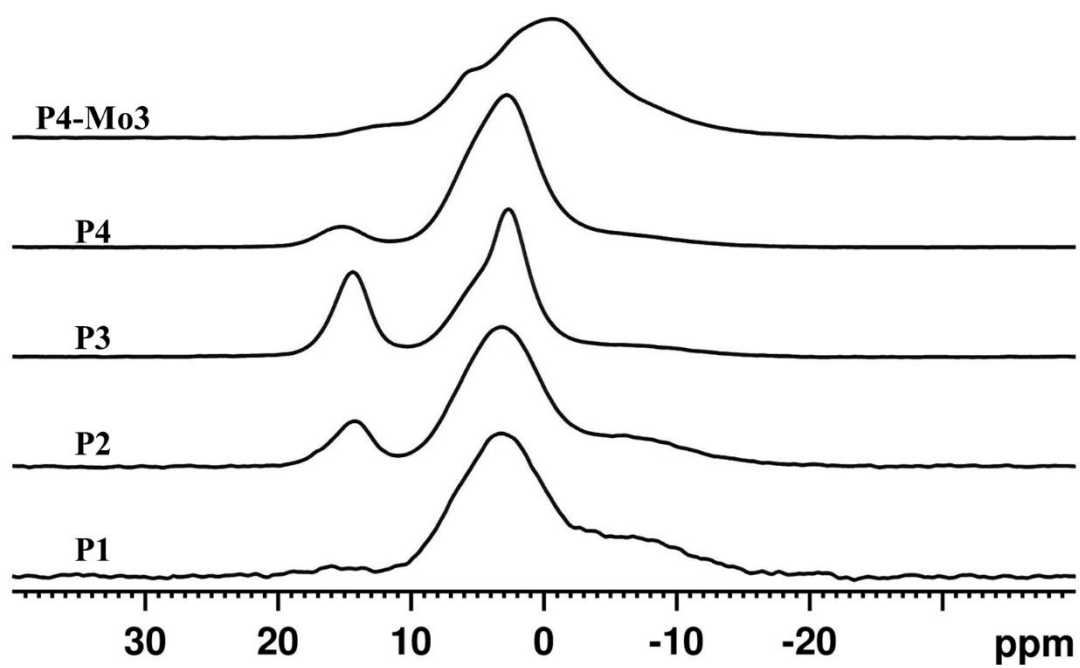

**Figure S3.**  $^{31}\text{P}$  MAS NMR spectra of glasses

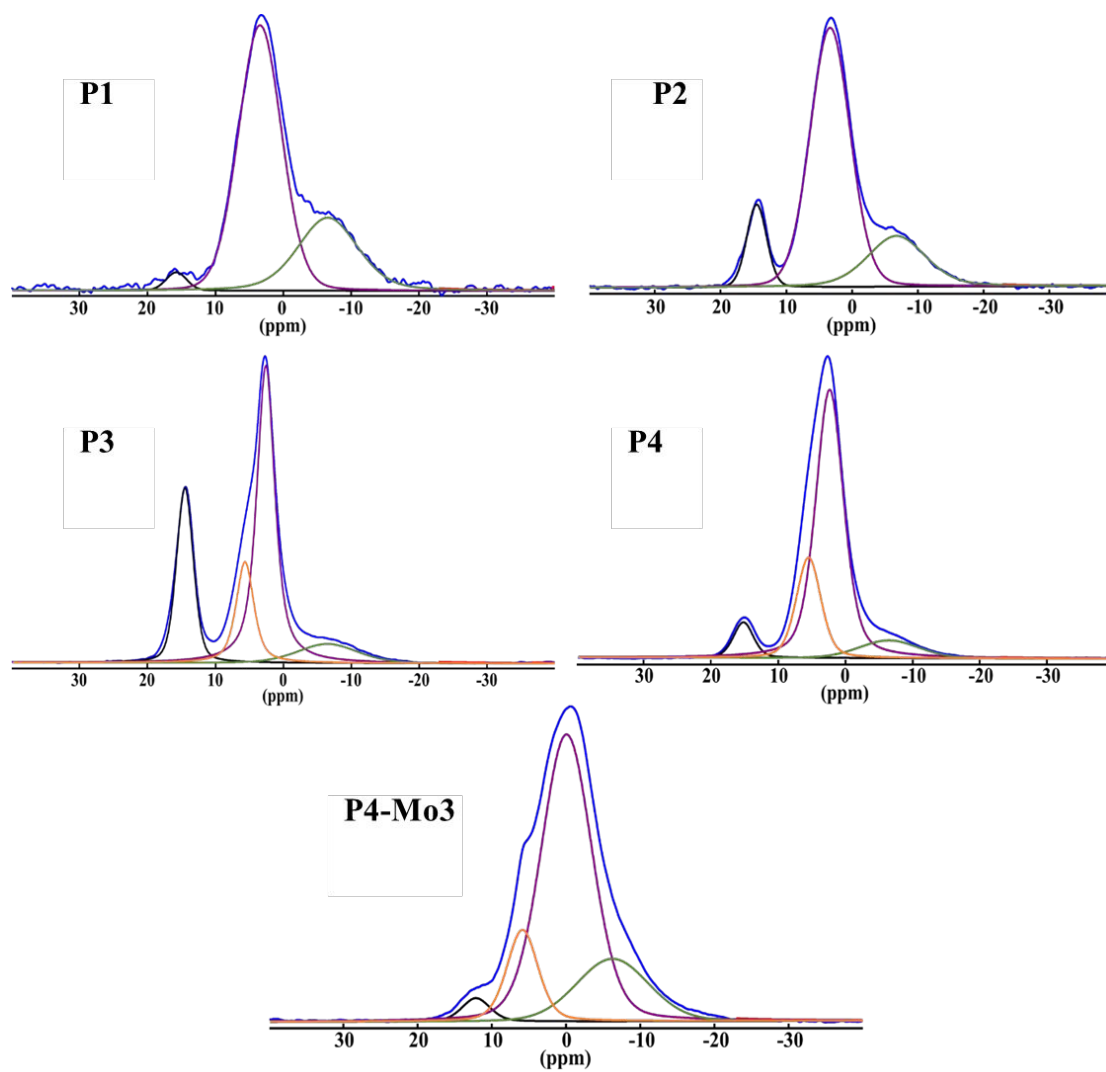

**Figure S4.** Deconvolution of  $^{31}\text{P}$  MAS NMR spectra. Blue is the experimental spectrum and components in black, orange, purple and green represent  $\text{P}^0$ ,  $\text{P}^1$ ,  $\text{P}^2_{\text{nB(Al)}}$  and poorly crystalline  $\text{Na}_4\text{P}_2\text{O}_7$ , respectively.

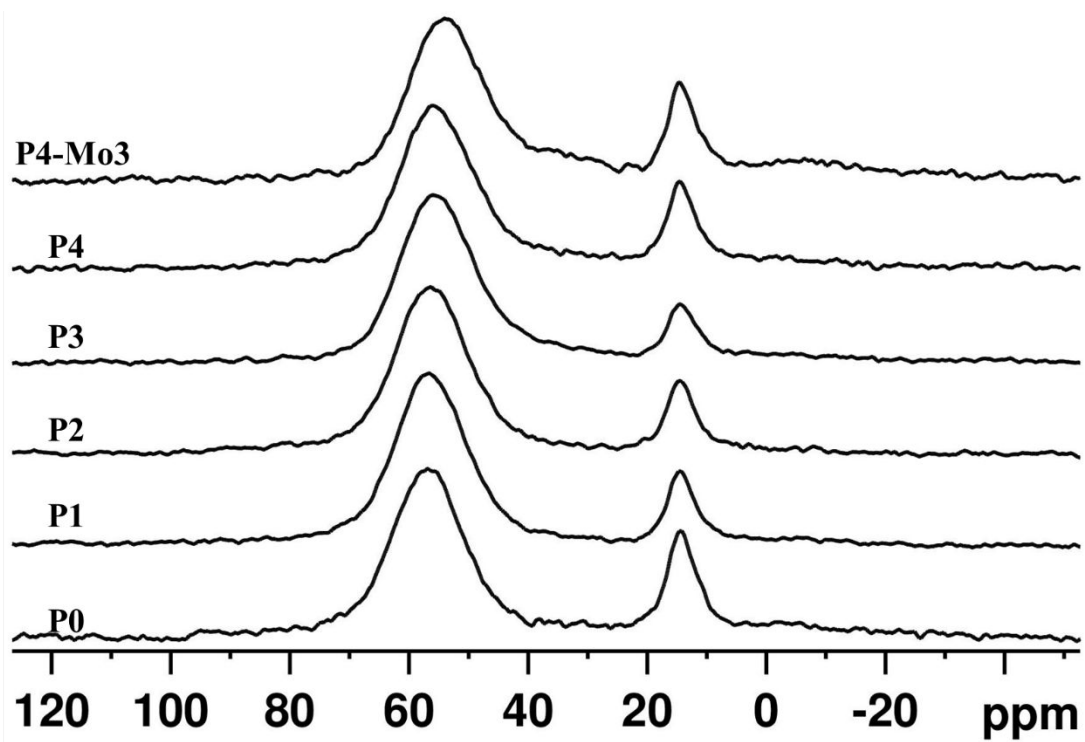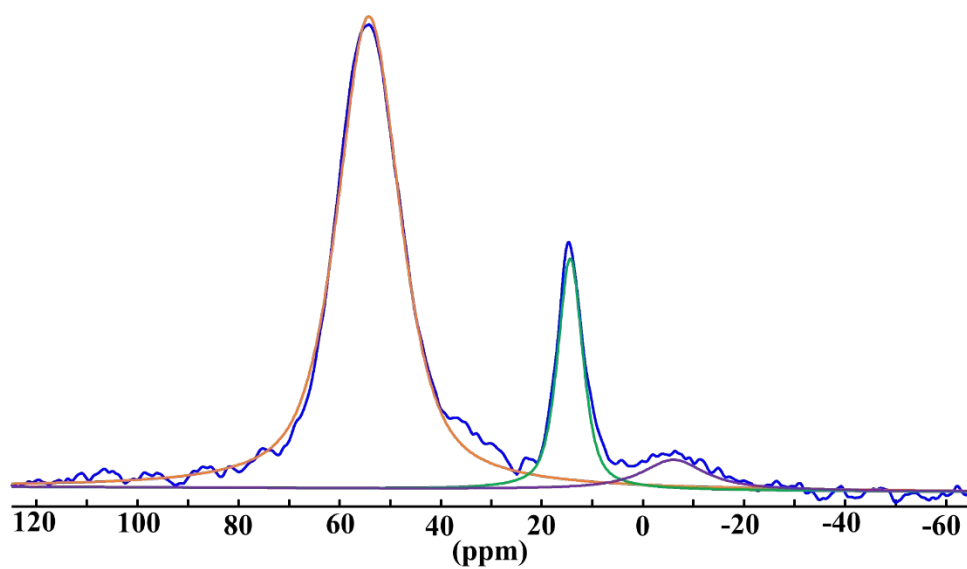

**Figure S5.**  $^{27}\text{Al}$  MAS NMR spectra of glasses (top) and deconvolution of  $^{27}\text{Al}$  MAS NMR spectrum of P4-Mo3, where orange, green and purple components represent  $^{41}\text{Al}$ ,  $^{51}\text{Al}$  and  $^{61}\text{Al}$  units, respectively.

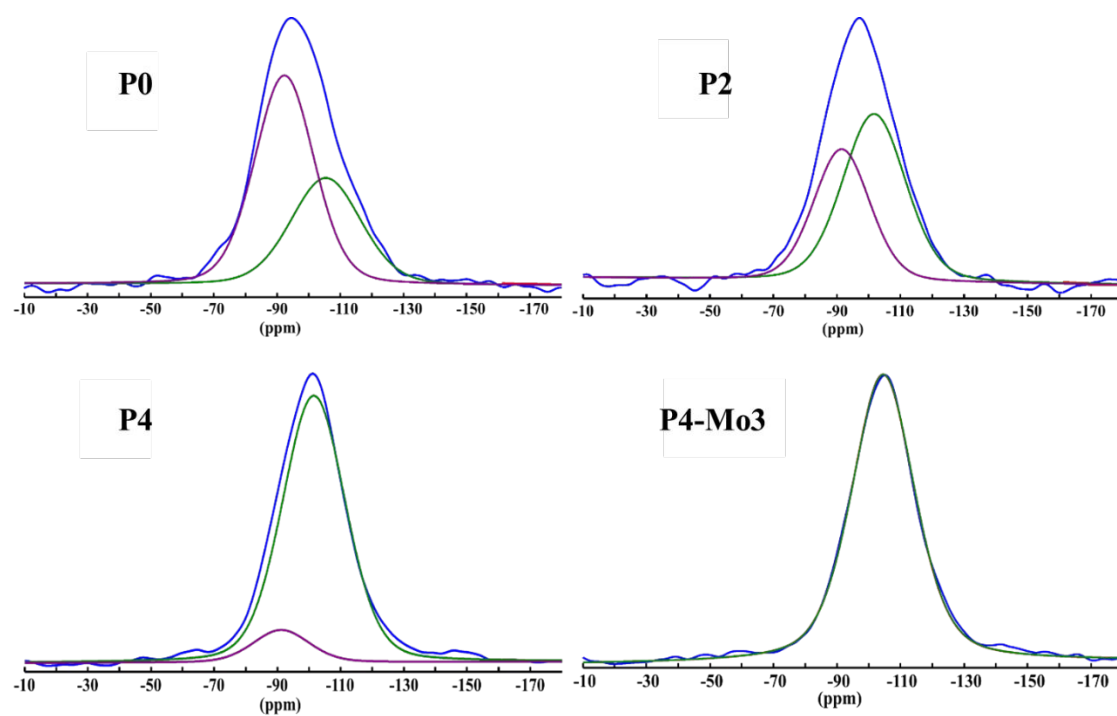

**Figure S6.** Deconvolution of  $^{29}\text{Si}$  MAS NMR spectra. The subspectral components in purple and green represent  $\text{Q}^3$  and  $\text{Q}^4$  units, respectively.



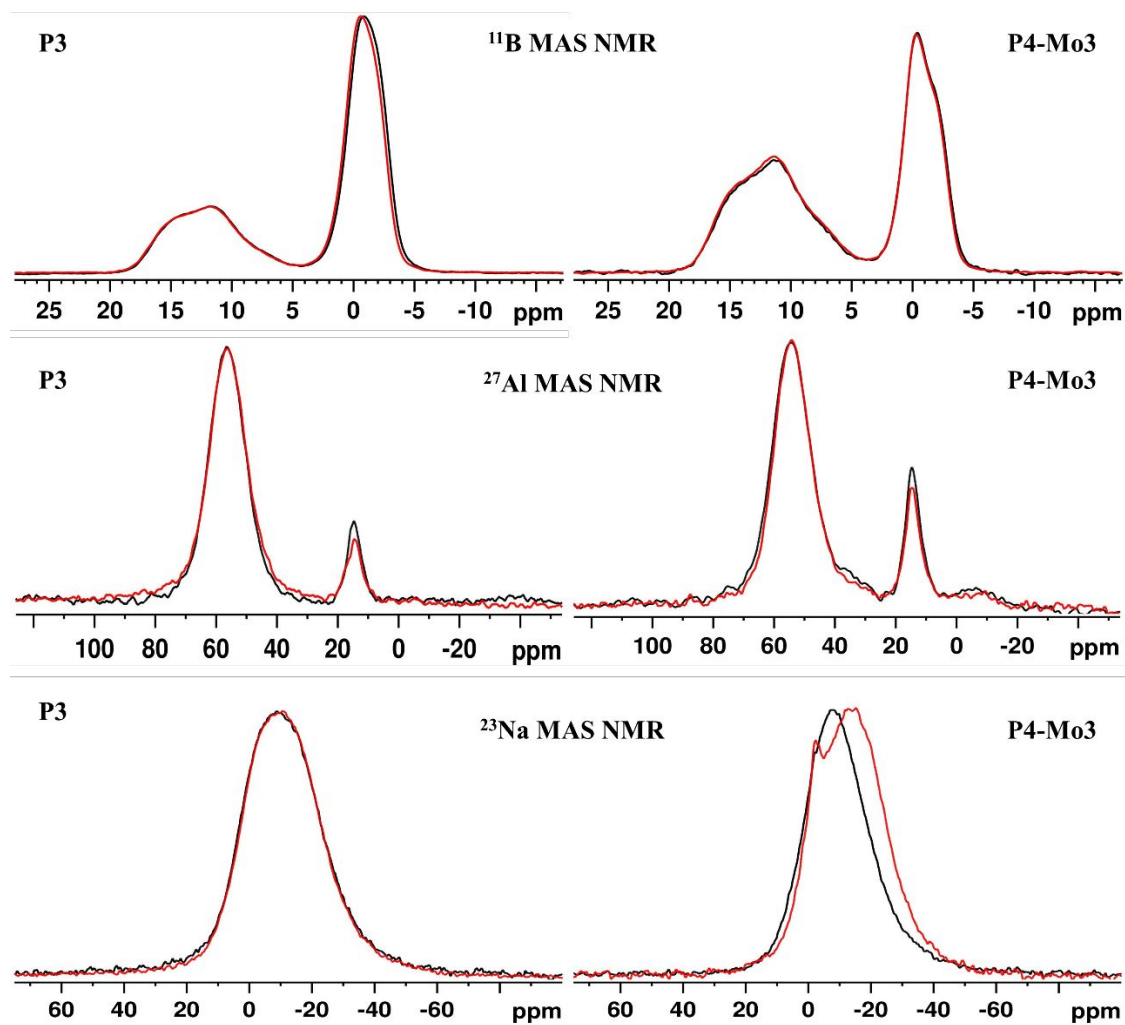

**Figure S7.**  $^{11}\text{B}$ ,  $^{27}\text{Al}$  and  $^{23}\text{Na}$  MAS NMR spectra of P3 and P4-Mo3 before (black) and after (red) dissolution.

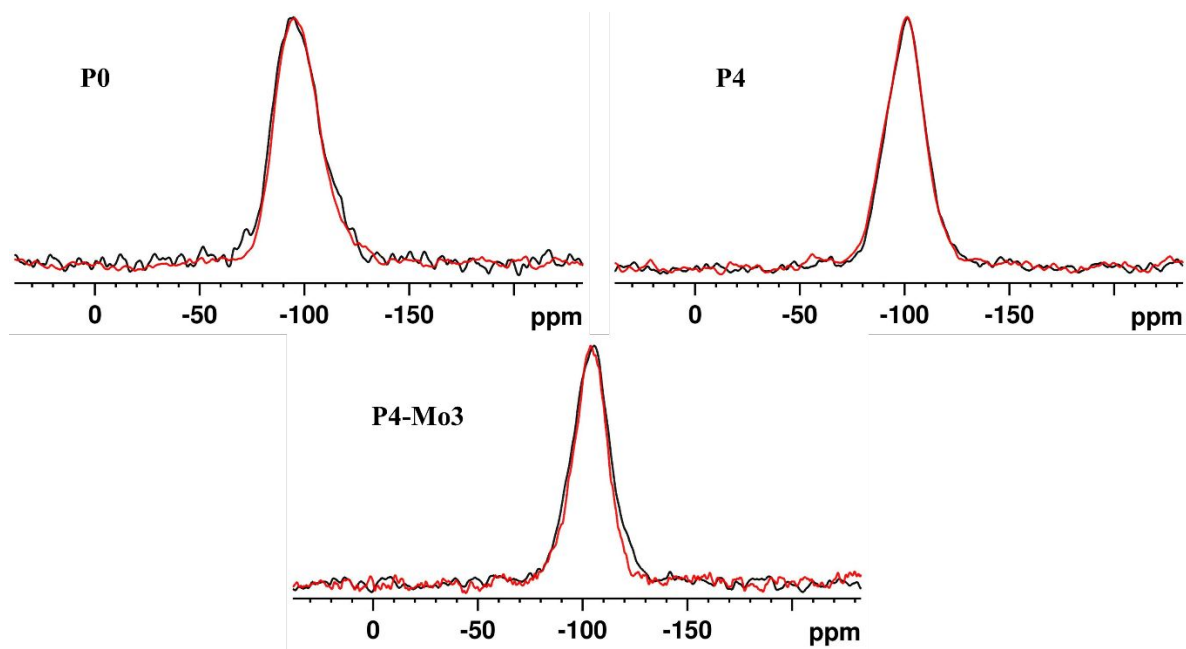

**Figure S8.**  $^{29}\text{Si}$  MAS NMR spectra before (black) and after (red) dissolution

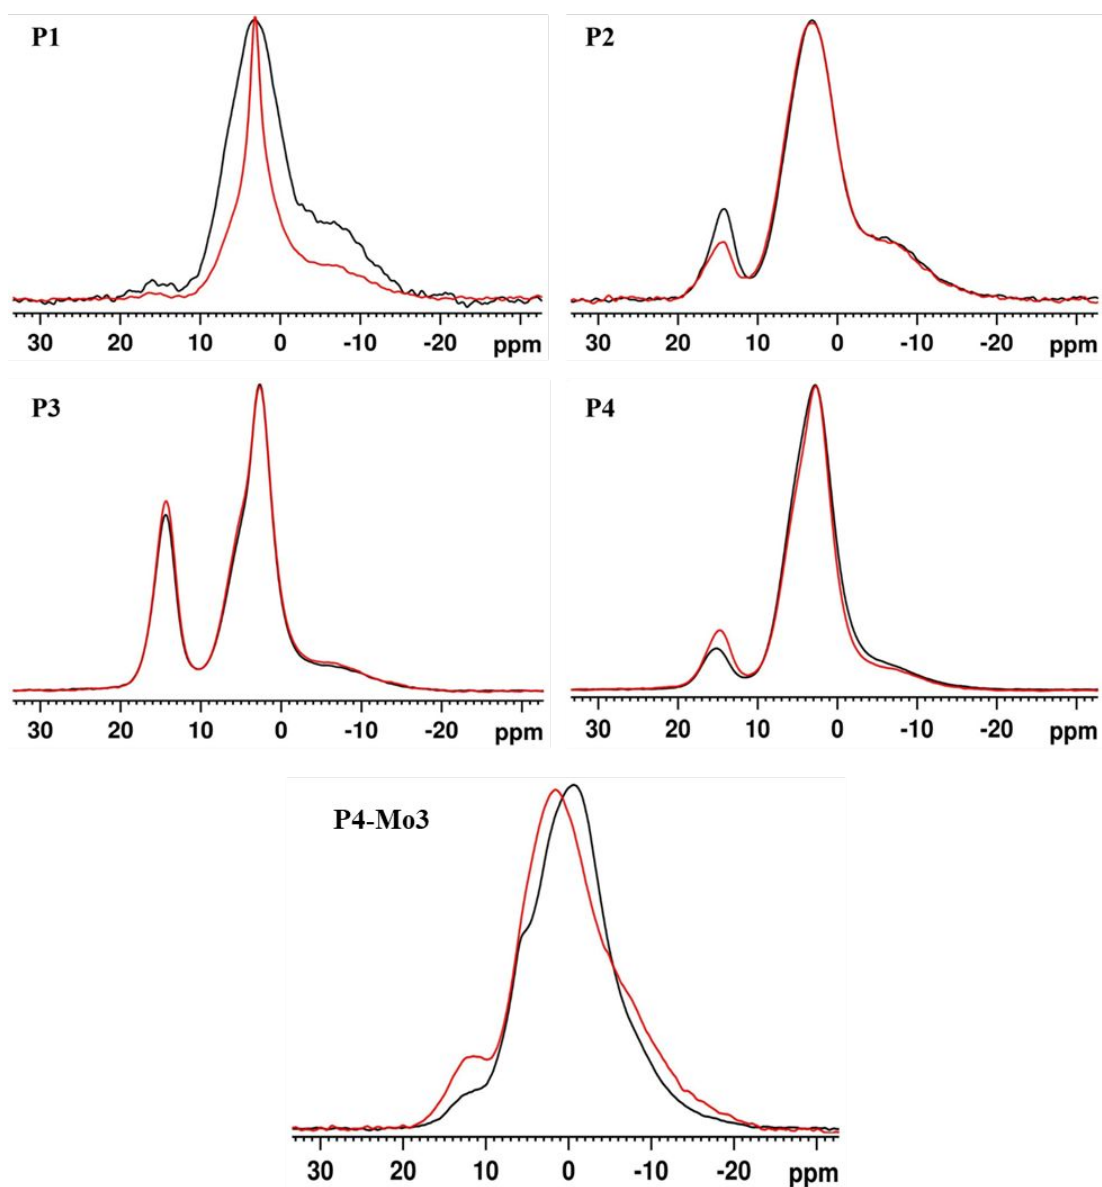

**Figure S9.** An overlay of  $^{31}\text{P}$  MAS NMR spectra before (black) and after (red) the dissolution.

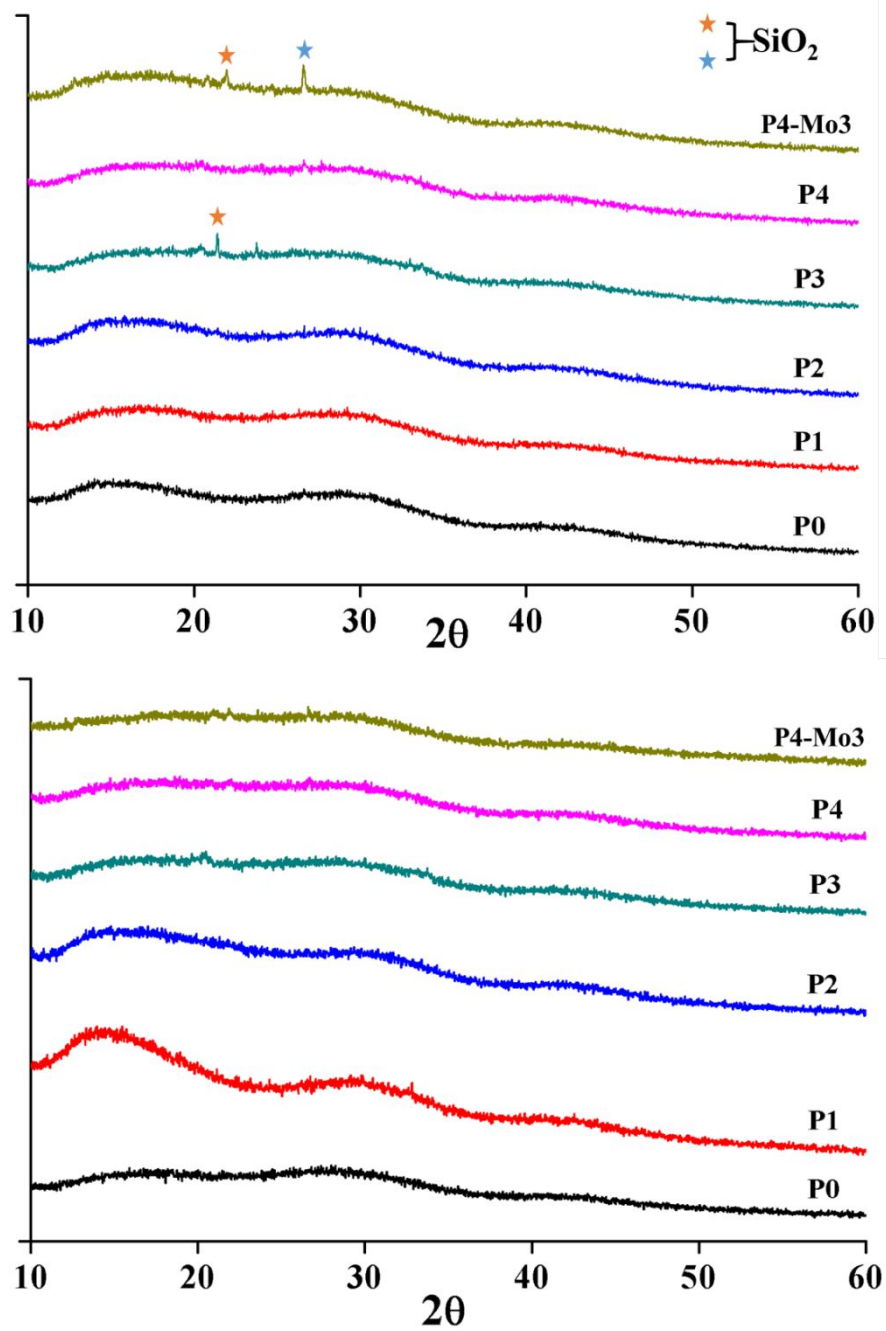

**Figure S10.** X-ray diffractograms before (top) and after (bottom) dissolution. The orange and blue stars represent reflections from the  $\text{SiO}_2$  phases, cristobalite and quartz, respectively.

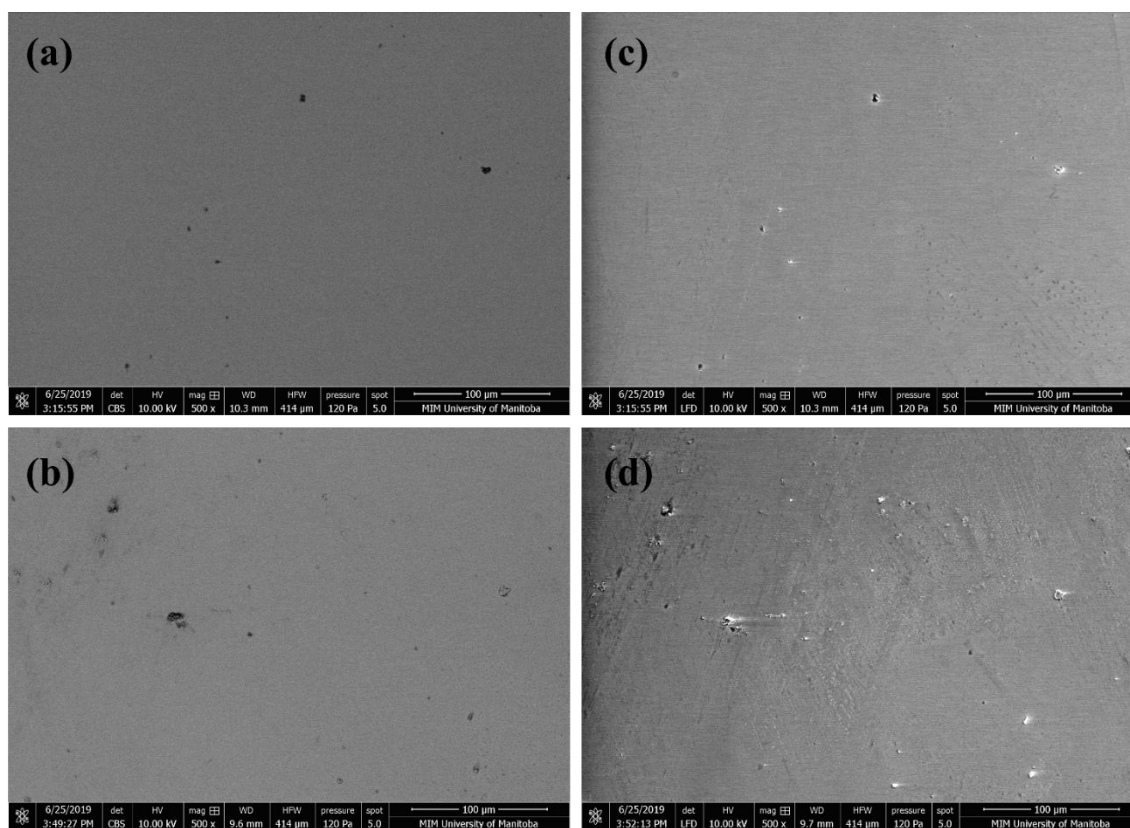

**Figure S11.** SEM images (500x magnification) of glasses prior to dissolution: (a) BSE image of P0, (b) BSE image of P4, (c) SE image of P0, (d) SE image of P4.

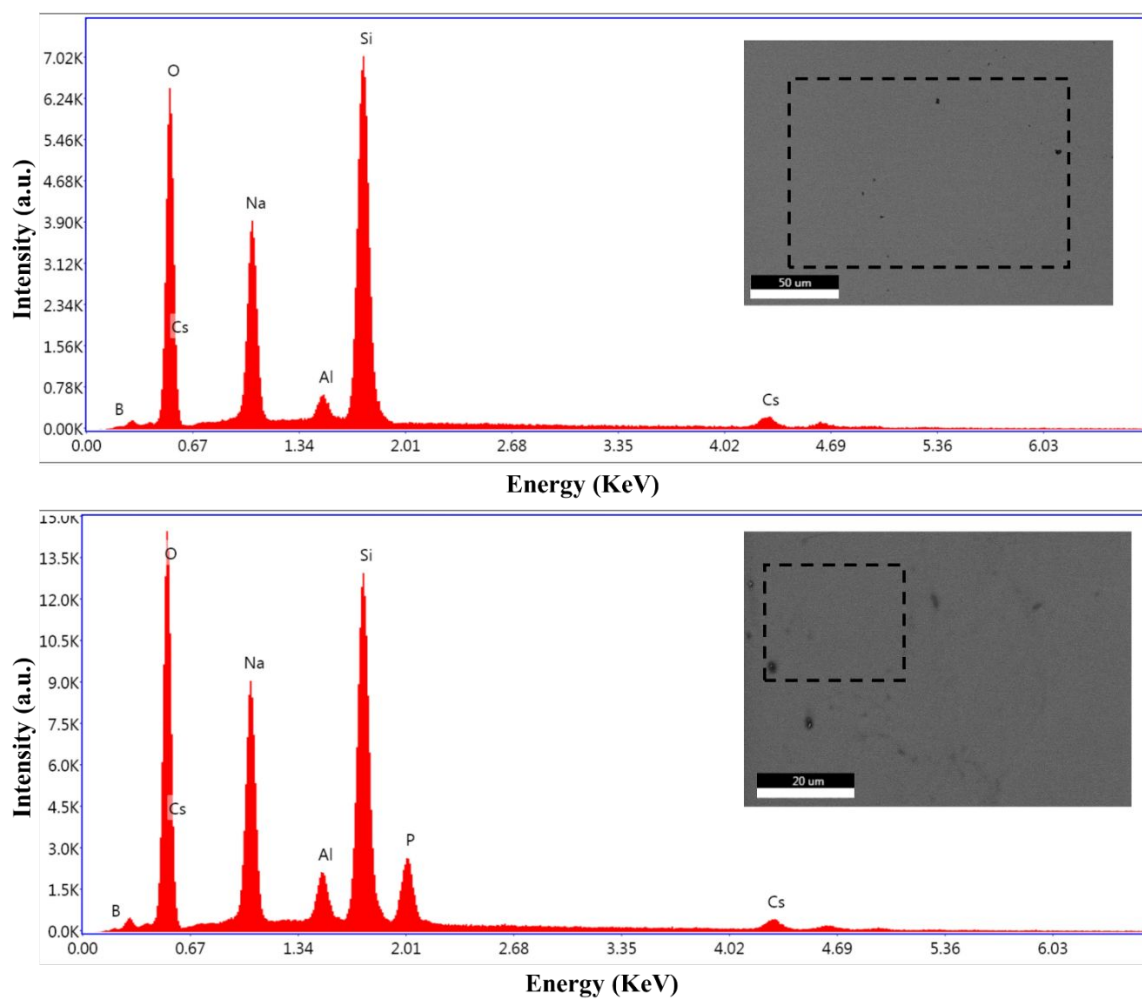

**Figure S12.** EDS spectra of glasses P0 and P4 with their corresponding BSE images. The dotted rectangles show the analyzed areas.



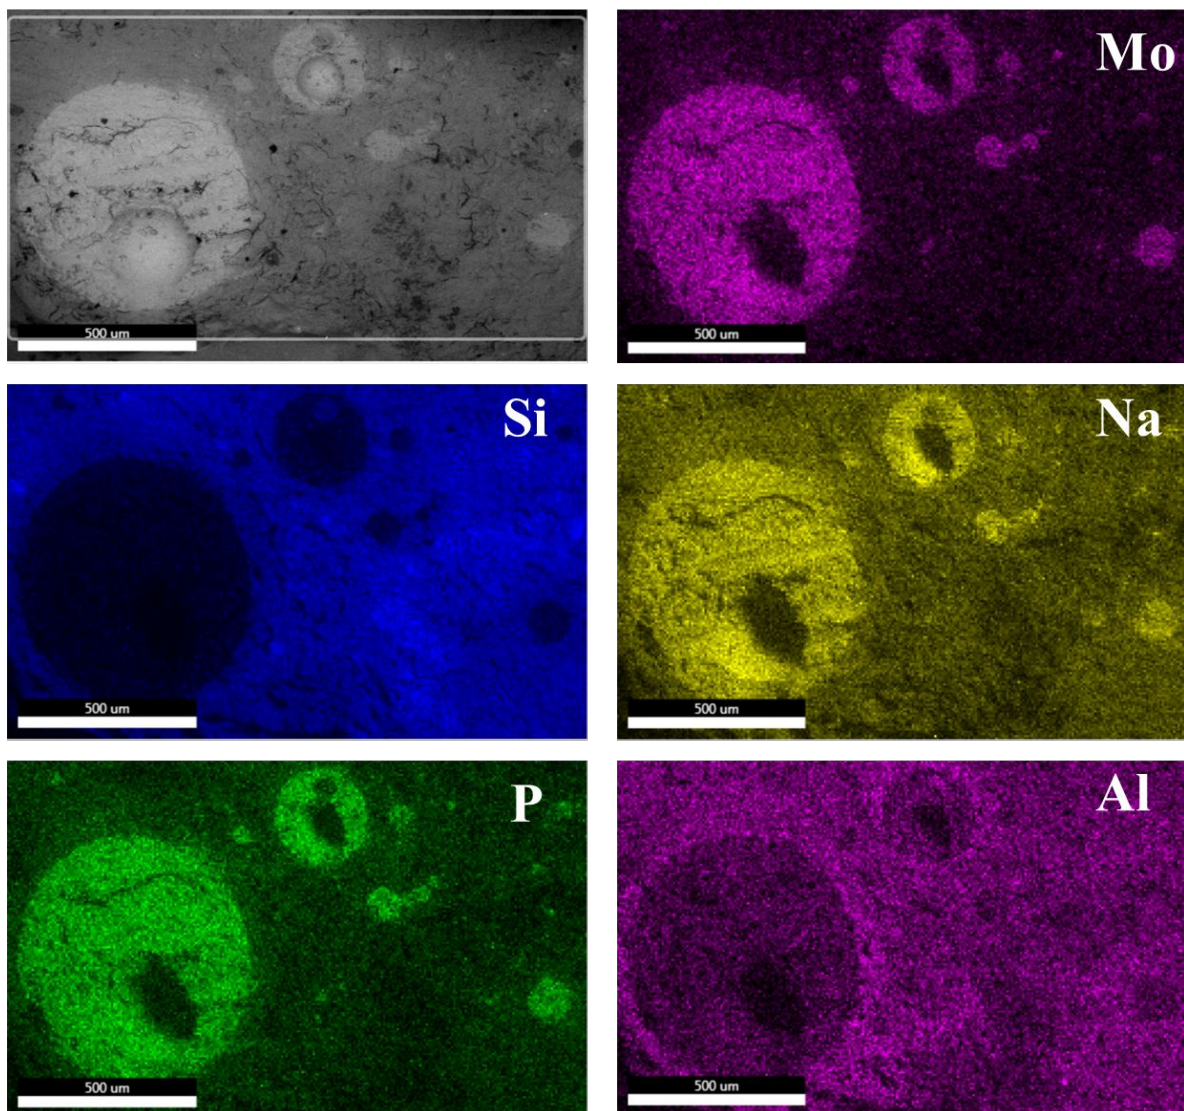

**Figure S13.** BSE image of a cross-section of P4-Mo3 and the element maps showing the distribution of elements in the mapped area.

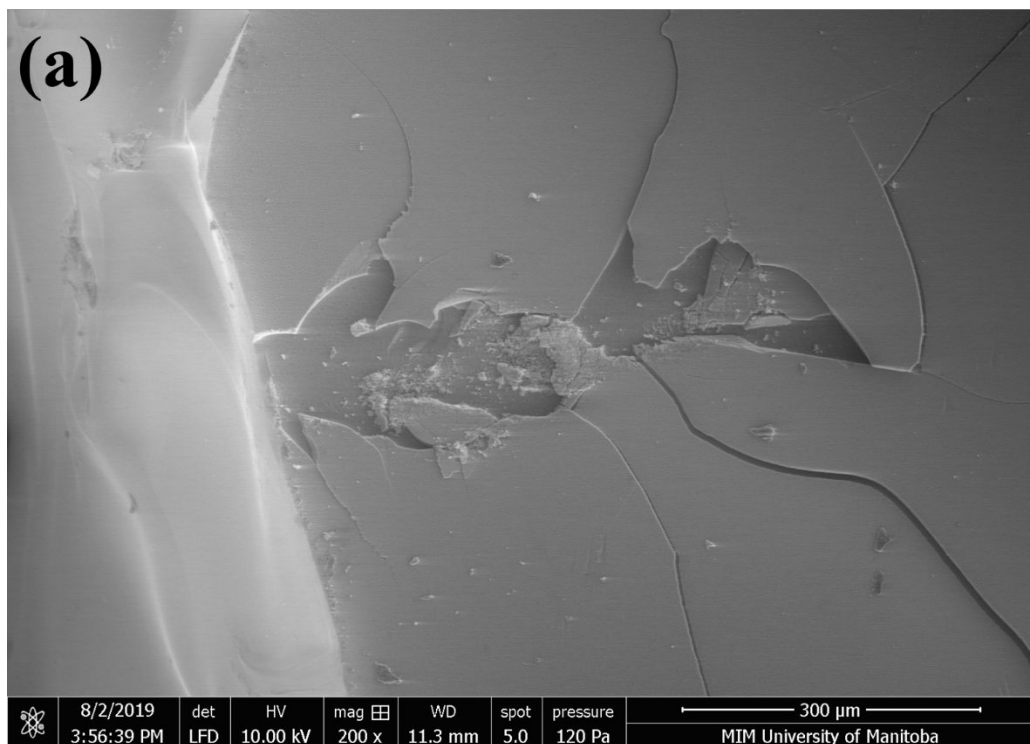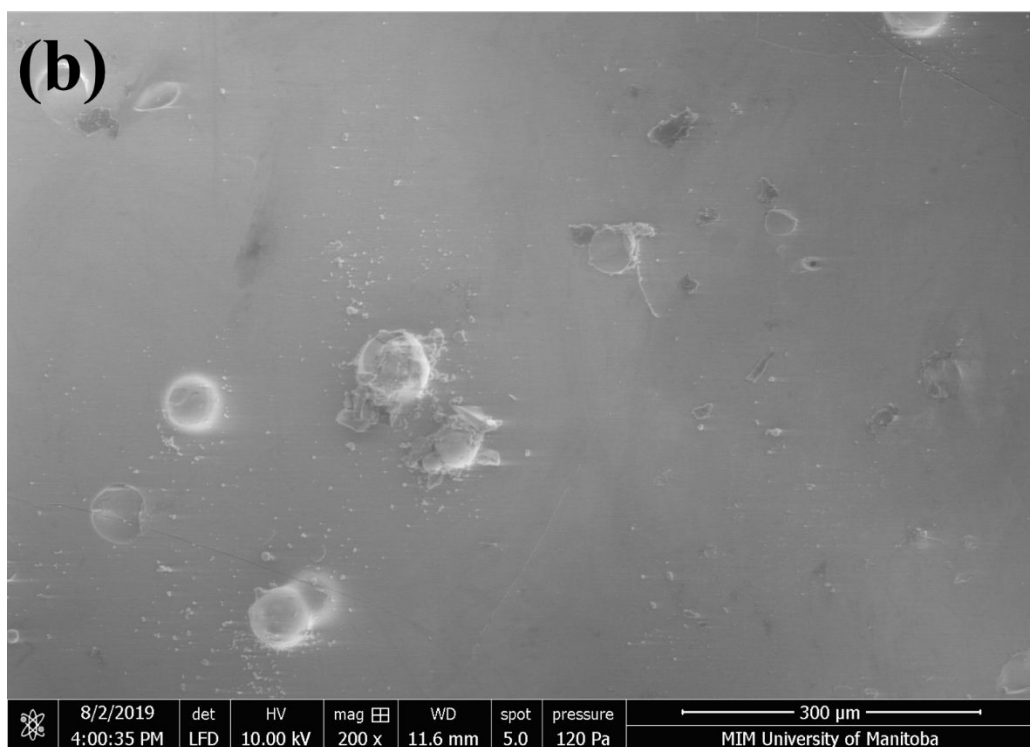

**Figure S14.** BSE images of the surfaces of (a) P4 and (b) P4-Mo<sub>3</sub> after dissolution.



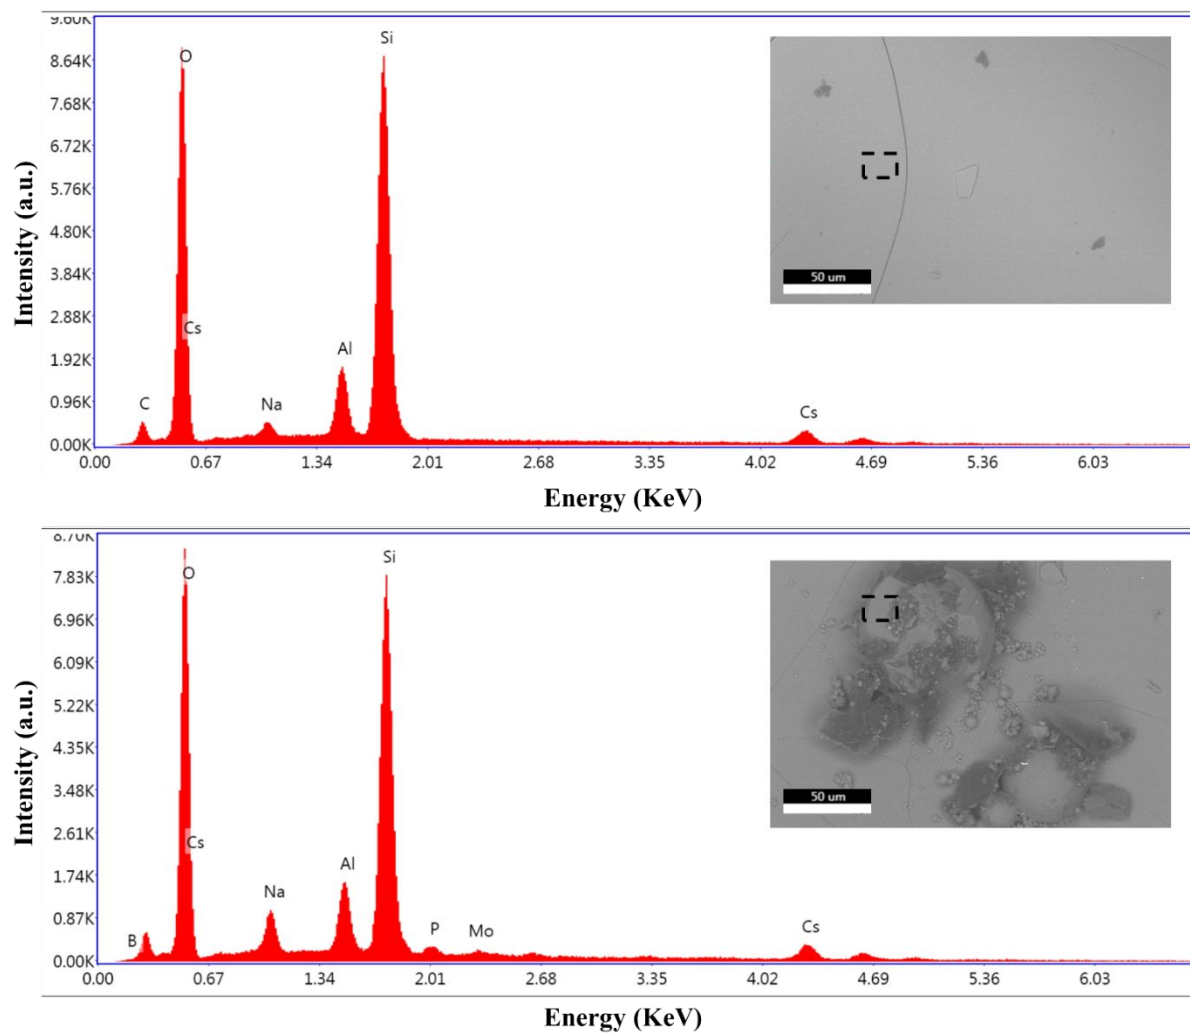

**Figure S15.** EDS spectra of the surfaces of glasses P4 (top) and P4-Mo3 (bottom) after dissolution.

The analyzed areas are marked with a dotted square in the BSE images shown.

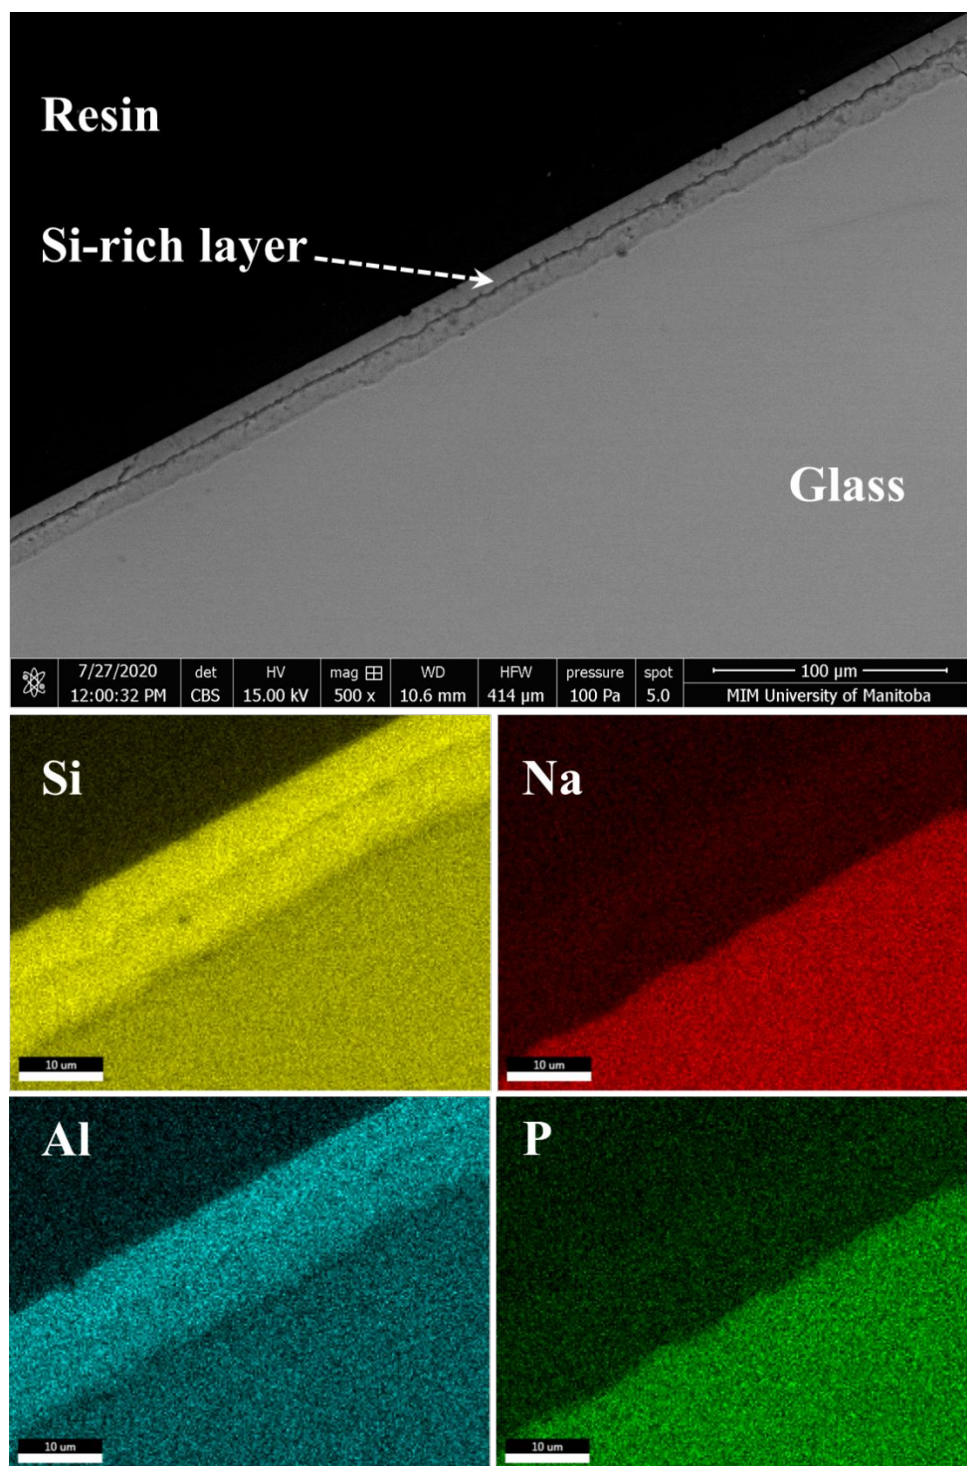

**Figure S16.** Back-scattered electron image of a cross-section of sample P4 after dissolution, and element maps of the Si-rich layer deposited on the glass surface
